# Supplementary material for: Integration of network pharmacology, molecular docking, and simulations to evaluate phytochemicals from Drymaria cordata against cervical cancer
Source: Royal Society of Chemistry journal article supplement (doi:10.1039/d3ra06297j), 2024-01-01
Supplement: d3ra06297j1.pdf [file d3ra06297j1.pdf]

**Table S1.** Molecular properties and Drug likeness score of *Drymaria cordata* phytochemicals.

| S. No. | Bioactives                                                                                       | MF                                                            | MW     | NHBA | NHBD | Mol. Vol (A <sup>3</sup> ) | DLS   |
|--------|--------------------------------------------------------------------------------------------------|---------------------------------------------------------------|--------|------|------|----------------------------|-------|
| 1      | 2,4 DNP (2,4 Dinitrophenyl hydrazine)                                                            | C <sub>6</sub> H <sub>6</sub> N <sub>4</sub> O <sub>4</sub>   | 198.04 | 5    | 3    | 145.74                     | -1.78 |
| 2      | 2,4 D (2,4 Dichloro phenoxy acetic acid)                                                         | C <sub>8</sub> H <sub>6</sub> Cl <sub>2</sub> O <sub>3</sub>  | 219.97 | 3    | 1    | 171.10                     | -0.64 |
| 3      | 2,3,6-Trichlorobenzoic acid                                                                      | C <sub>7</sub> H <sub>3</sub> Cl <sub>3</sub> O <sub>2</sub>  | 223.92 | 2    | 1    | 157.45                     | -1.18 |
| 4      | Drymaritin                                                                                       | C <sub>15</sub> H <sub>10</sub> N <sub>2</sub> O <sub>2</sub> | 250.07 | 3    | 0    | 260.08                     | -0.60 |
| 5      | 1,6-anhydro-β-D-Glucopyranose                                                                    | C <sub>6</sub> H <sub>10</sub> O <sub>5</sub>                 | 162.05 | 5    | 3    | 128.62                     | -1.17 |
| 6      | L-Gala-L-Ido-Octose                                                                              | C <sub>8</sub> H <sub>16</sub> O <sub>8</sub>                 | 240.08 | 8    | 7    | 198.27                     | -0.42 |
| 7      | 3,7,11,15-tetramethyle-2-hexabecen-1-ol                                                          | C <sub>20</sub> H <sub>40</sub> O                             | 296.31 | 1    | 1    | 372.58                     | -0.87 |
| 8      | n-hexadecanoic acid                                                                              | C <sub>16</sub> H <sub>32</sub> O <sub>2</sub>                | 256.24 | 2    | 1    | 305.93                     | -0.54 |
| 9      | 9,12-Octadecadienoic acid, methyl ester                                                          | C <sub>18</sub> H <sub>32</sub> O <sub>2</sub>                | 280.24 | 2    | 1    | 353.96                     | -0.30 |
| 10     | Oleyl alcohol                                                                                    | C <sub>18</sub> H <sub>36</sub> O                             | 268.28 | 1    | 1    | 344.00                     | -1.11 |
| 11     | 17- octa decynoic acid                                                                           | C <sub>18</sub> H <sub>32</sub> O <sub>2</sub>                | 280.24 | 2    | 1    | 342.70                     | -0.15 |
| 12     | 1,1 –diphenyl-2-picrylhydrazyl                                                                   | C <sub>18</sub> H <sub>13</sub> N <sub>5</sub> O <sub>6</sub> | 395.09 | 6    | 1    | 327.30                     | -1.33 |
| 13     | Stigmasterol                                                                                     | C <sub>29</sub> H <sub>48</sub> O                             | 412.37 | 1    | 1    | 529.89                     | 0.62  |
| 14     | quercetin 3-O-β-D-glucopyranosyl-(1->2)-rhamnopyranoside                                         | C <sub>27</sub> H <sub>30</sub> O <sub>16</sub>               | 610.15 | 16   | 10   | 533.87                     | 0.88  |
| 15     | 24-ethyl-cholesta-5,22E-dien-3β-O-β-D-glucopyranosyle                                            | C <sub>37</sub> H <sub>62</sub> O <sub>6</sub>                | 602.45 | 6    | 4    | 703.47                     | 0.47  |
| 16     | digalactosyldiacylglycerol                                                                       | C <sub>49</sub> H <sub>88</sub> O <sub>15</sub>               | 916.61 | 15   | 7    | 972.05                     | 0.16  |
| 17     | Cyclohexen 1,4,5-triol-3-one-1-Carboxylic acid                                                   | C <sub>7</sub> H <sub>10</sub> O <sub>6</sub>                 | 190.05 | 6    | 4    | 177.83                     | -0.77 |
| 18     | [(2S,3S,4R,8E)-2N-[(2')-2'-hydroxylpentaecosanoyl]-8(E)-tetraecosanoyl-1, 3, 4-triol]            | C <sub>49</sub> H <sub>97</sub> NO <sub>5</sub>               | 779.74 | 5    | 5    | 935.92                     | -0.97 |
| 19     | (2S,3R,4E,8E,2'R)-1-O-β-D-glucopyranosyl-2- (2-hydroxypalmitoyl)-amino-4,8-octadecadien-1,3-diol | C <sub>26</sub> H <sub>49</sub> NO <sub>9</sub>               | 519.34 | 10   | 8    | 528.72                     | -0.33 |
| 20     | 5,4'-dihydroxy-7-methoxyflavone-6-C – (2''-O-α-L-rhamnopyranosyl)-β-D-glucopyranoside            | C <sub>28</sub> H <sub>32</sub> O <sub>15</sub>               | 608.17 | 15   | 9    | 536.36                     | 0.90  |
| 21     | 5,7,3' ,4' -tetrahydroxyflavone-6-C-(2''-O-α-L-rhamnopyranosyl)-β-D-glucopyranoside              | C <sub>27</sub> H <sub>30</sub> O <sub>16</sub>               | 610.15 | 16   | 11   | 529.09                     | 0.81  |
| 22     | Cassiaoccidentalinalin A                                                                         | C <sub>26</sub> H <sub>26</sub> O <sub>15</sub>               | 578.13 | 15   | 9    | 506.04                     | 0.94  |

MF: Molecular formula, MW: Molecular weight, NHBA- Number of Hydrogen Bond Donor, NHBD- Number of Hydrogen Bond Acceptor, DLS- Drug likeness Score

**Table S2.** Toxicity analysis of selected phytochemicals.

| Phytochemicals                                                                                       | Hepatotoxicity | Carcinogenicity | Mutagenicity | Cytotoxicity |
|------------------------------------------------------------------------------------------------------|----------------|-----------------|--------------|--------------|
| Stigmasterol                                                                                         | Inactive       | Inactive        | Inactive     | Inactive     |
| 24-ethyl-cholesta-5,22E-dien-3 $\beta$ -O- $\beta$ -D-glucopyranosyle                                | Inactive       | Inactive        | Inactive     | Inactive     |
| 5,4'-dihydroxy-7-methoxyflavone-6-C-(2''-O- $\alpha$ -L-rhamnopyranosyl)- $\beta$ -D-glucopyranoside | Inactive       | Inactive        | Inactive     | Inactive     |
| quercetin 3-O- $\beta$ -D-glucopyranosyl-(1->2)-rhamnopyranoside                                     | Inactive       | Inactive        | Inactive     | Inactive     |
| 5,7,3',4' - tetrahydroxyflavone-6-C-(2''-O- $\alpha$ -L-rhamnopyranosyl)- $\beta$ -D-glucopyranoside | Inactive       | Inactive        | Inactive     | Inactive     |
| Cassiaoccidentalinalin A                                                                             | Inactive       | Inactive        | Inactive     | Inactive     |

**Table S3.** Binding free energy components for the quercetin 3-O- $\beta$ -D-glucopyranosyl-(1->2)-rhamnopyranoside complexed with 4QAF and 7JII proteins calculated by MM-GBSA.

| <b>Energies (kcal/mol)</b>       | <b>4QAF+ quercetin 3-O-<math>\beta</math>-D-glucopyranosyl-(1-&gt;2)-rhamnopyranoside</b> | <b>7JII+ quercetin 3-O-<math>\beta</math>-D-glucopyranosyl-(1-&gt;2)-rhamnopyranoside</b> |
|----------------------------------|-------------------------------------------------------------------------------------------|-------------------------------------------------------------------------------------------|
| $\Delta G_{\text{bind}}$         | -76.04 $\pm$ 2.63                                                                         | -85.26 $\pm$ 2.99                                                                         |
| $\Delta G_{\text{bindLipo}}$     | -23.96 $\pm$ 1.03                                                                         | -31.50 $\pm$ 3.1                                                                          |
| $\Delta G_{\text{bindvdW}}$      | -51.10 $\pm$ 2.0                                                                          | -70.63 $\pm$ 2.63                                                                         |
| $\Delta G_{\text{bindCoulomb}}$  | -8.12 $\pm$ 1.99                                                                          | -43.66 $\pm$ 2.88                                                                         |
| $\Delta G_{\text{bindHbond}}$    | -0.41 $\pm$ 0.22                                                                          | -1.87 $\pm$ 0.5                                                                           |
| $\Delta G_{\text{bindSolvGB}}$   | 16.5 $\pm$ 1.09                                                                           | 60.54 $\pm$ 2.8                                                                           |
| $\Delta G_{\text{bindCovalent}}$ | 1.56 $\pm$ 1.2                                                                            | 4.22 $\pm$ 1.07                                                                           |

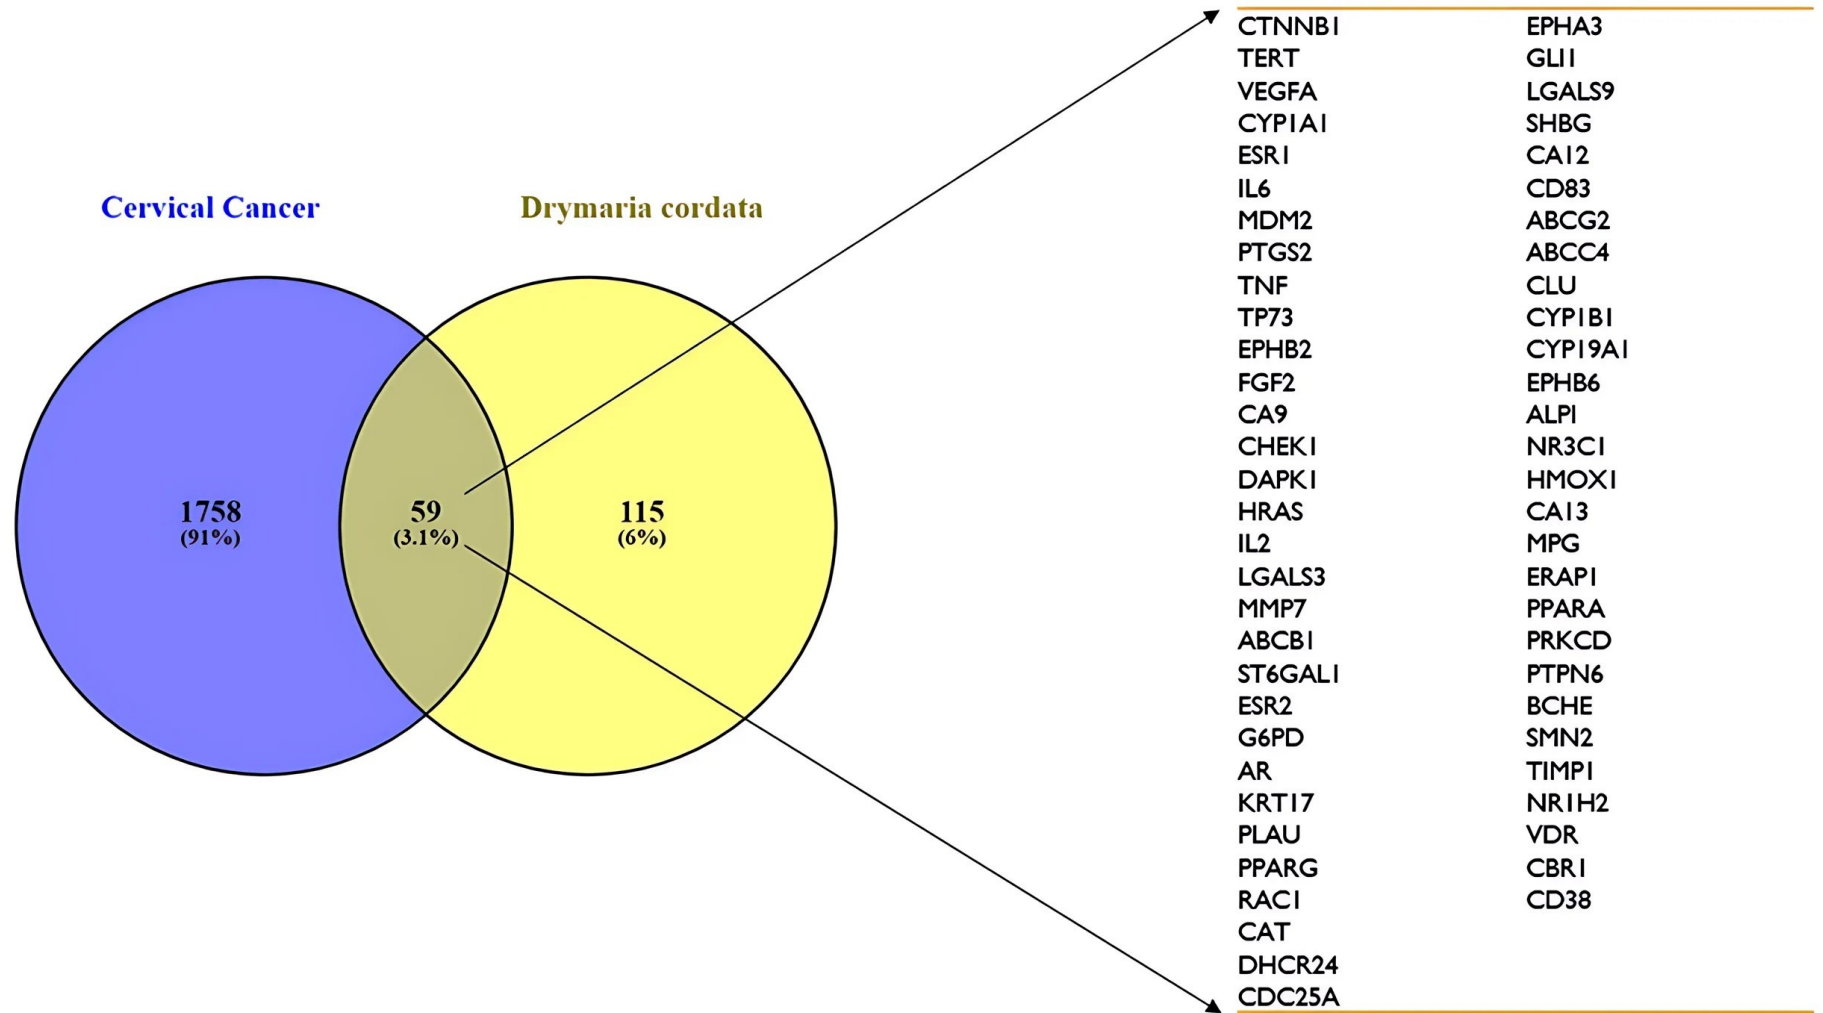

**Figure S1.** Venn Diagram of Cervical cancer genes and genes interacted by phytochemicals of *Drymaria cordata*.

a

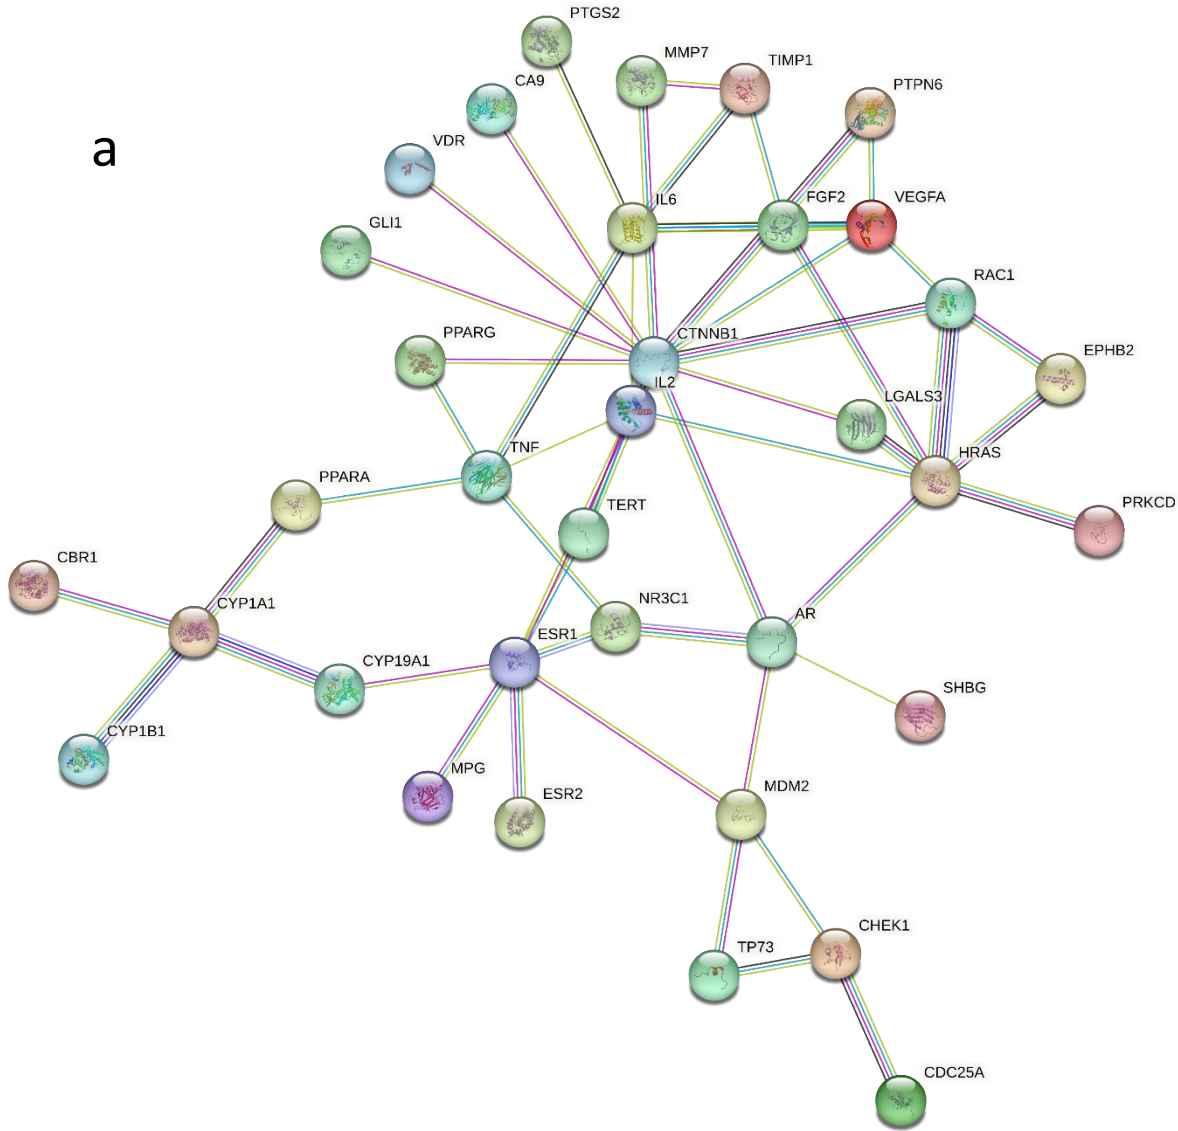

b

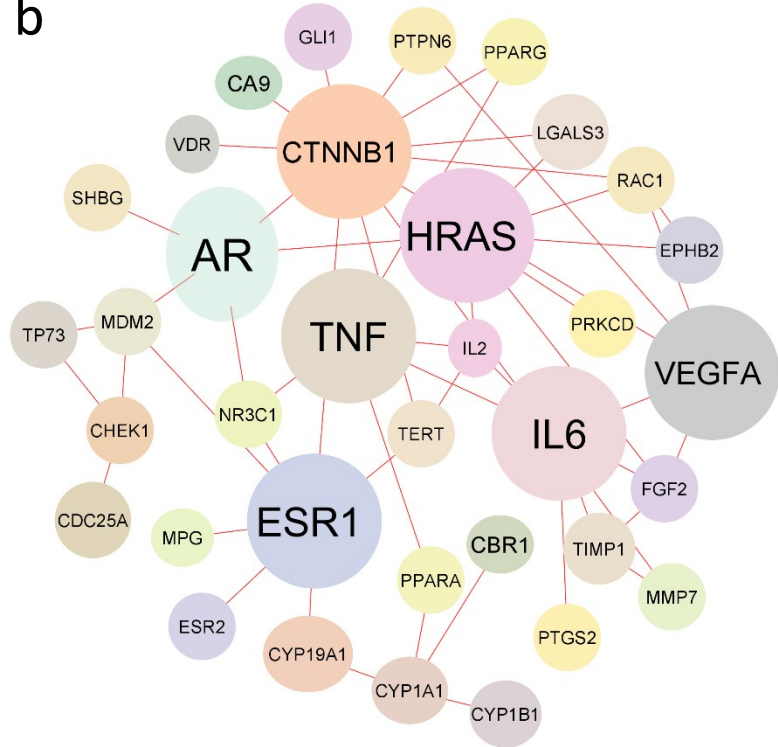

**Figure S2.** a: Protein-protein interaction (visualized in a: STRING and b: Cytoscape after analysis) of the phytochemicals-triggered proteins. Node color;  colored nodes: query proteins and first shell of interactors,  filled nodes: some 3D structure is known or predicted, Known Interactions;  from curated databases,  experimentally determined, Predicted Interactions;  gene neighbourhood,  gene fusions,  gene co-occurrence & Others;  text mining,  co-expression,  protein homology.

|         | ASPL        | BeCe        | ClCe        | ClCo        | ECC | S   | D  | NC          | NU | TC       | EC | ID | OD | RL       |
|---------|-------------|-------------|-------------|-------------|-----|-----|----|-------------|----|----------|----|----|----|----------|
| AR      | 2.352941176 | 0.18028181  | 0.425       | 0           | 5   | 464 | 5  | 5.4         | 5  | 0.244444 | 5  | 0  | 5  | 0.887255 |
| NR3C1   | 2.558823529 | 0.050717257 | 0.390804598 | 0           | 4   | 166 | 3  | 5.666666667 | 3  | 0.388889 | 3  | 2  | 1  | 0.870098 |
| MDM2    | 2.705882353 | 0.175579323 | 0.369565217 | 0.166666667 | 5   | 416 | 4  | 4.25        | 4  | 0.340909 | 4  | 3  | 1  | 0.857843 |
| CTNNB1  | 2           | 0.419612087 | 0.5         | 0.045454545 | 4   | 770 | 12 | 2.916666667 | 12 | 0.12963  | 12 | 2  | 10 | 0.916667 |
| SHBG    | 3.323529412 | 0           | 0.300884956 | 0           | 6   | 0   | 1  | 5           | 1  | 0        | 1  | 1  | 0  | 0.806373 |
| HRAS    | 2.588235294 | 0.143260334 | 0.386363636 | 0.047619048 | 5   | 338 | 7  | 3.142857143 | 7  | 0.220779 | 7  | 3  | 4  | 0.867647 |
| CA9     | 2.970588235 | 0           | 0.336633663 | 0           | 5   | 0   | 1  | 12          | 1  | 0        | 1  | 0  | 1  | 0.835784 |
| CBR1    | 4.352941176 | 0           | 0.22972973  | 0           | 6   | 0   | 1  | 4           | 1  | 0        | 1  | 0  | 1  | 0.720588 |
| CYP1A1  | 3.382352941 | 0.124480095 | 0.295652174 | 0           | 5   | 188 | 4  | 1.5         | 4  | 0.25     | 4  | 2  | 2  | 0.801471 |
| CDC25A  | 4.558823529 | 0           | 0.219354839 | 0           | 7   | 0   | 1  | 3           | 1  | 0        | 1  | 0  | 1  | 0.703431 |
| CHEK1   | 3.588235294 | 0.058823529 | 0.278688525 | 0.333333333 | 6   | 128 | 3  | 2.333333333 | 3  | 0.5      | 3  | 1  | 2  | 0.784314 |
| TP73    | 3.617647059 | 0           | 0.276422764 | 1           | 6   | 0   | 2  | 3.5         | 2  | 0.7      | 2  | 2  | 0  | 0.781863 |
| GLI1    | 2.970588235 | 0           | 0.336633663 | 0           | 5   | 0   | 1  | 12          | 1  | 0        | 1  | 1  | 0  | 0.835784 |
| LGALS3  | 2.764705882 | 0.009625668 | 0.361702128 | 0           | 5   | 44  | 2  | 9.5         | 2  | 0.566667 | 2  | 2  | 0  | 0.852941 |
| MMP7    | 2.823529412 | 0.024509804 | 0.354166667 | 0           | 5   | 46  | 2  | 7.5         | 2  | 0.5      | 2  | 1  | 1  | 0.848039 |
| PPARG   | 2.647058824 | 0.020796197 | 0.377777778 | 0           | 5   | 32  | 2  | 8.5         | 2  | 0.5      | 2  | 1  | 1  | 0.862745 |
| TERT    | 2.382352941 | 0.028478058 | 0.419753086 | 0.333333333 | 4   | 76  | 3  | 7.666666667 | 3  | 0.366667 | 3  | 3  | 0  | 0.884804 |
| PTPN6   | 2.852941176 | 0           | 0.350515464 | 1           | 5   | 0   | 2  | 8.5         | 2  | 0.607143 | 2  | 1  | 1  | 0.845588 |
| RAC1    | 2.647058824 | 0.038265003 | 0.377777778 | 0.333333333 | 5   | 90  | 4  | 6.5         | 4  | 0.361111 | 4  | 3  | 1  | 0.862745 |
| VEGFA   | 2.529411765 | 0.061650115 | 0.395348837 | 0.3         | 5   | 142 | 5  | 5.6         | 5  | 0.28     | 5  | 5  | 0  | 0.872549 |
| VDR     | 2.970588235 | 0           | 0.336633663 | 0           | 5   | 0   | 1  | 12          | 1  | 0        | 1  | 1  | 0  | 0.835784 |
| ESR1    | 2.205882353 | 0.32102538  | 0.453333333 | 0.047619048 | 4   | 632 | 7  | 3.714285714 | 7  | 0.176471 | 7  | 2  | 5  | 0.89951  |
| CYP19A1 | 2.941176471 | 0.106654783 | 0.34        | 0           | 5   | 164 | 2  | 5.5         | 2  | 0.5      | 2  | 0  | 2  | 0.838235 |
| CYP1B1  | 4.352941176 | 0           | 0.22972973  | 0           | 6   | 0   | 1  | 4           | 1  | 0        | 1  | 1  | 0  | 0.720588 |
| PPARA   | 3.264705882 | 0.060606061 | 0.306306306 | 0           | 6   | 90  | 2  | 4.5         | 2  | 0.5      | 2  | 1  | 1  | 0.811275 |
| EPHB2   | 3.176470588 | 0           | 0.314814815 | 1           | 6   | 0   | 2  | 5.5         | 2  | 0.611111 | 2  | 0  | 2  | 0.818627 |
| MPG     | 3.176470588 | 0           | 0.314814815 | 0           | 5   | 0   | 1  | 7           | 1  | 0        | 1  | 1  | 0  | 0.818627 |
| ESR2    | 3.176470588 | 0           | 0.314814815 | 0           | 5   | 0   | 1  | 7           | 1  | 0        | 1  | 1  | 0  | 0.818627 |
| FGF2    | 2.794117647 | 0.025923097 | 0.357894737 | 0.333333333 | 5   | 80  | 4  | 5.25        | 4  | 0.357143 | 4  | 0  | 4  | 0.85049  |
| TIMP1   | 3.147058824 | 0.008912656 | 0.317757009 | 0.333333333 | 6   | 16  | 3  | 4           | 3  | 0.458333 | 3  | 3  | 0  | 0.821078 |
| IL6     | 2.794117647 | 0.102346999 | 0.357894737 | 0.2         | 6   | 228 | 6  | 3.666666667 | 6  | 0.25     | 6  | 2  | 4  | 0.85049  |
| IL2     | 2.529411765 | 0.06022409  | 0.395348837 | 0.166666667 | 5   | 150 | 4  | 5.25        | 4  | 0.296875 | 4  | 1  | 3  | 0.872549 |
| PRKCD   | 3.558823529 | 0           | 0.280991736 | 0           | 6   | 0   | 1  | 7           | 1  | 0        | 1  | 1  | 0  | 0.786765 |
| TNF     | 2.529411765 | 0.129742806 | 0.395348837 | 0.1         | 5   | 242 | 5  | 3.4         | 5  | 0.233333 | 5  | 5  | 0  | 0.872549 |
| PTGS2   | 3.764705882 | 0           | 0.265625    | 0           | 7   | 0   | 1  | 6           | 1  | 0        | 1  | 1  | 0  | 0.769608 |

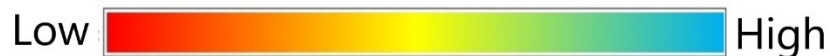

**Figure S3.** Score analysis of each protein for different protein nodes. *ASPL*: average short path length, *BeCe*: Betweenness Centrality, *CiCo*: clustering coefficient, *CiCe*: closeness centrality, *ECC*: eccentricity, *S*: stress, *D*: Degree, *NC*: neighbourhood connectivity, *NU*: Number of Undirected Edges, *TC*: Topological Coefficient, *EC*: Edge count, *ID*: In degree, *OD*: Outdegree, *RL*: Radiality.



**a**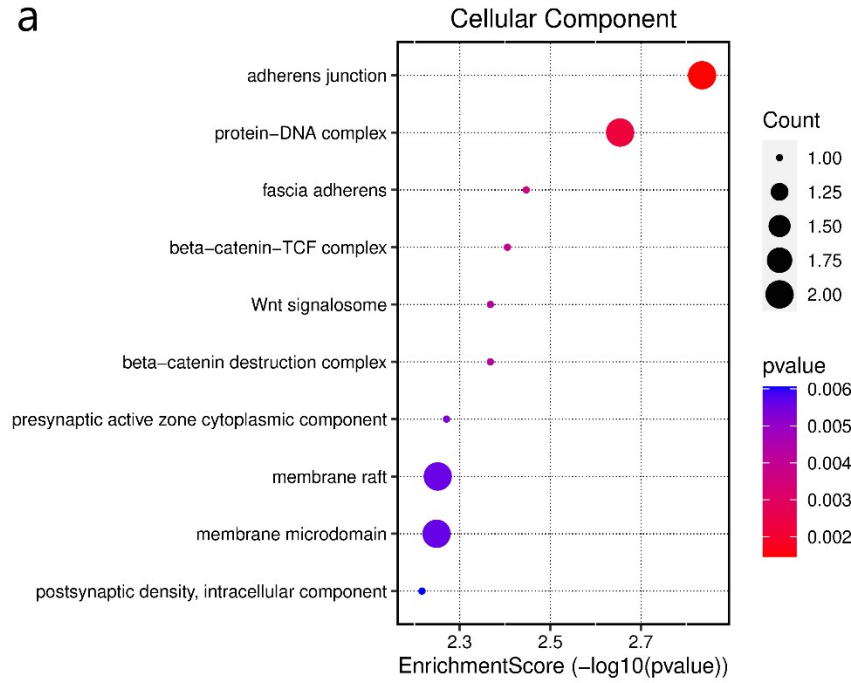**b**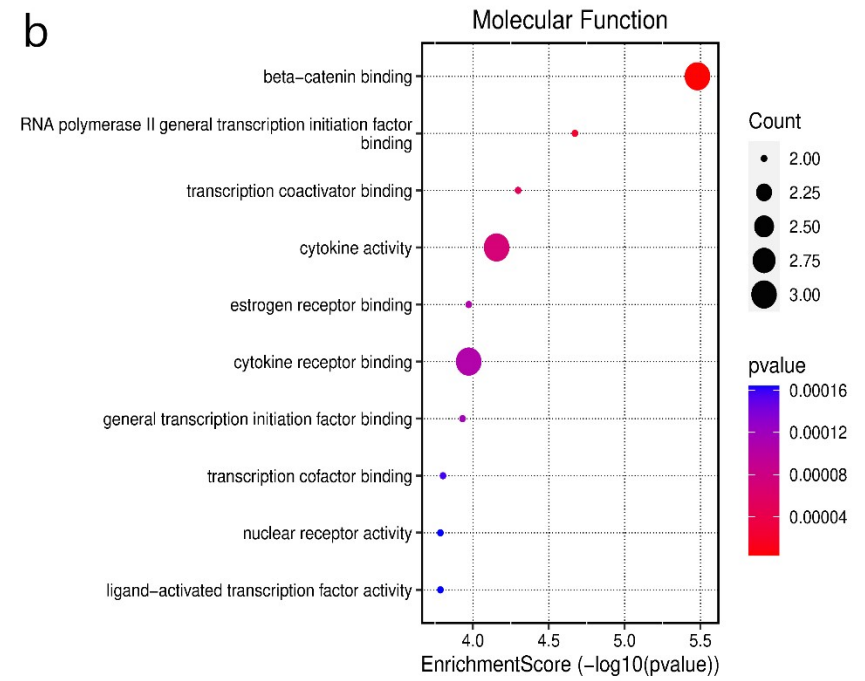**c**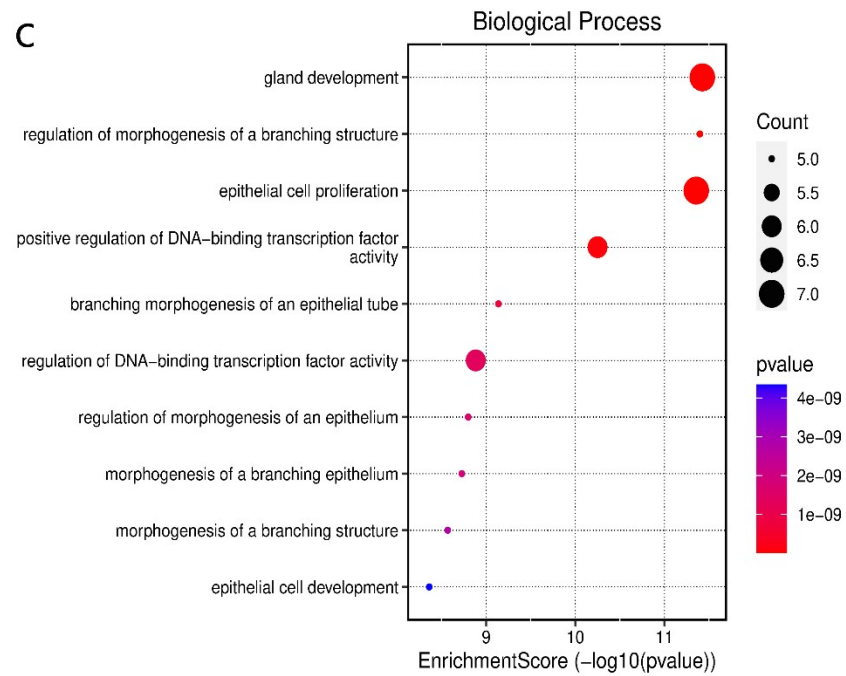

**Figure S4.** Gene ontology analysis of hub genes for cellular components, molecular function, and biological process. The gene ontology terms were evaluated at 5 percent false discovery rate stringency for Homo sapiens.



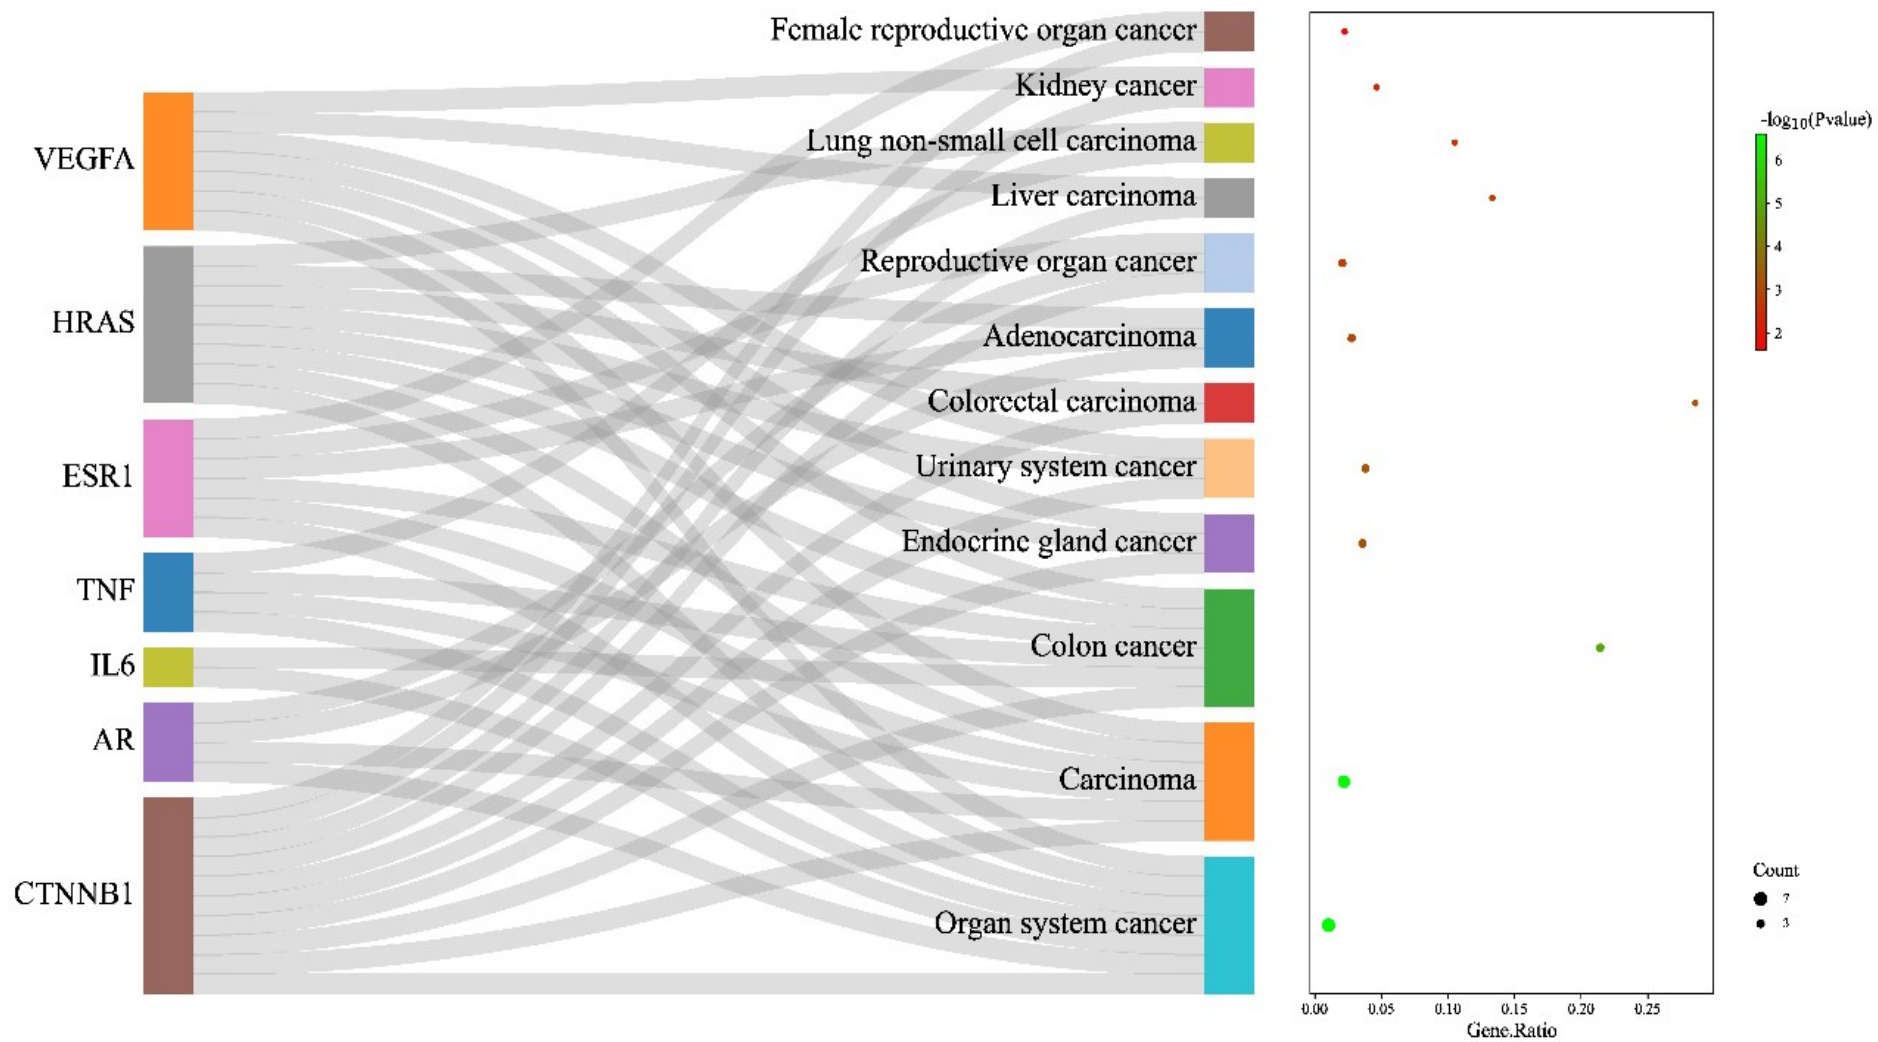

**Figure S6.** Interaction representation of the disease-gene association. The interaction was evaluated at a 5 % false discovery rate stringency for *Homo sapiens* against a whole genome statistical background run.

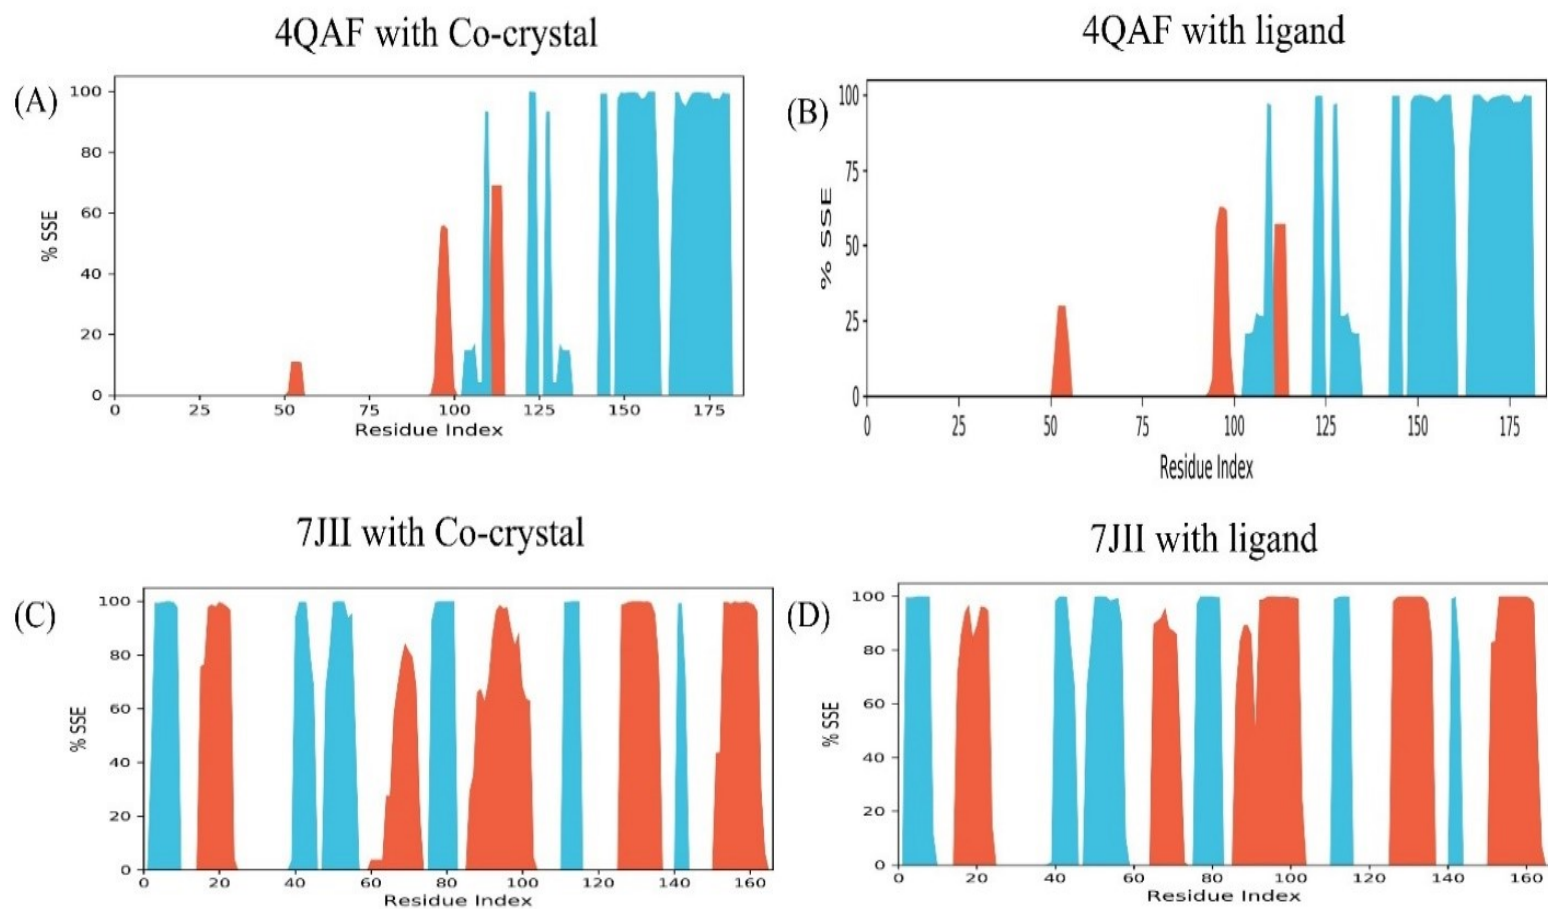

**Figure S7.** The distribution of protein-co-crystallized ligands and the protein-quercetin 3-O- $\beta$ -D-glucopyranosyl-(1->2)-rhamnopyranoside complex forms secondary structural elements by residue index across the protein structure. The graph illustrates the distribution of SSE based on the index of each residue within the protein's structure. The  $\alpha$ -helices are indicated by red color,  $\beta$ -strands are indicated by blue color, and the loop regions are indicated by white.

4QAF with Co-crystal

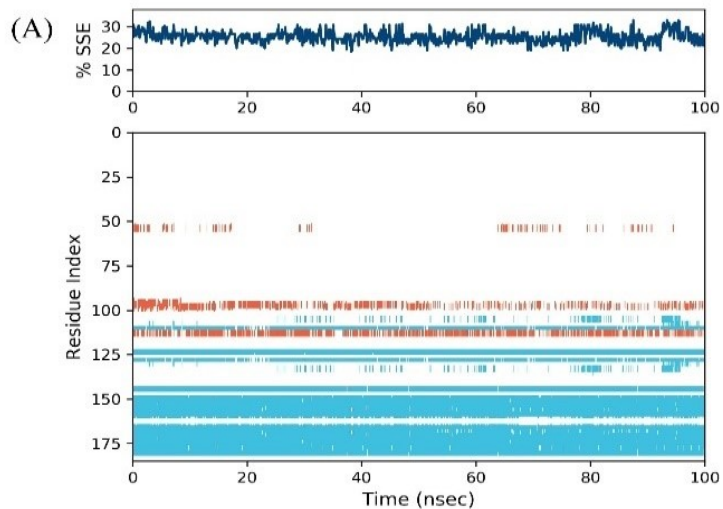

4QAF with ligand

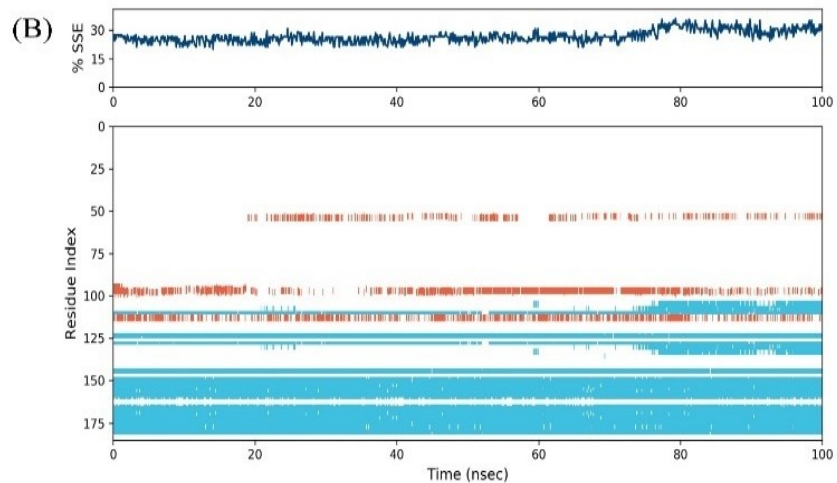

7JII with Co-crystal

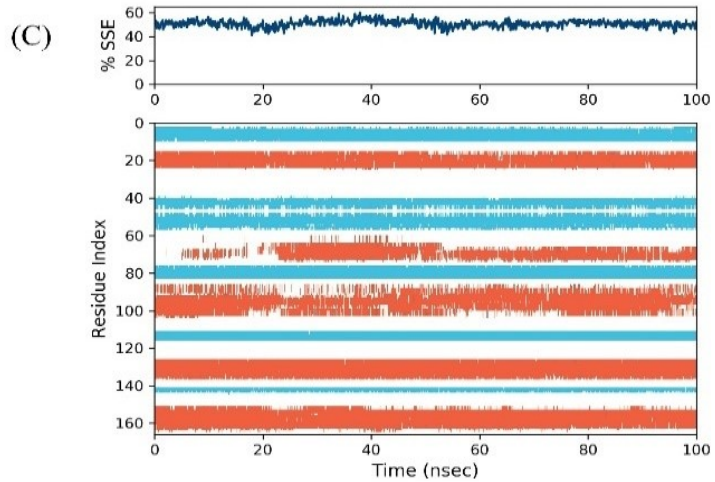

7JII with ligand

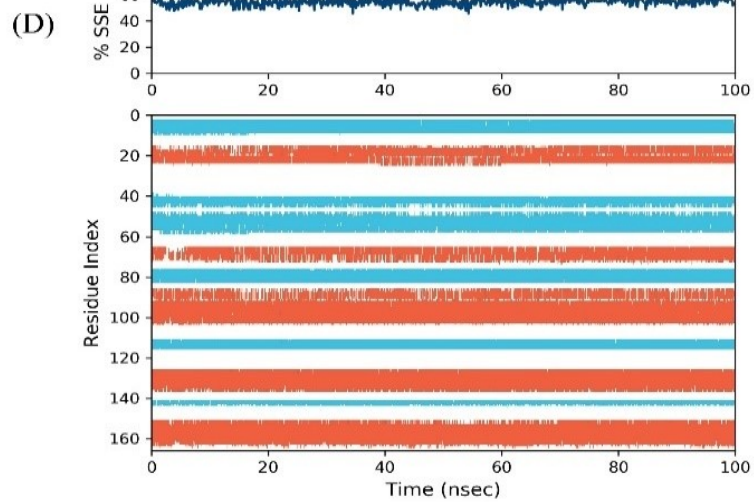

**Figure S8.** Evolution of secondary structure over the 100 ns simulation time and participation of different residues in the secondary structure. Alpha helices are indicated by red color,  $\beta$ -strands are indicated by light blue color, and the loop regions are indicated by white color in protein-co-crystallized ligand complexes and complexes with quercetin 3-O- $\beta$ -D-glucopyranosyl-(1->2)-rhamnopyranoside.

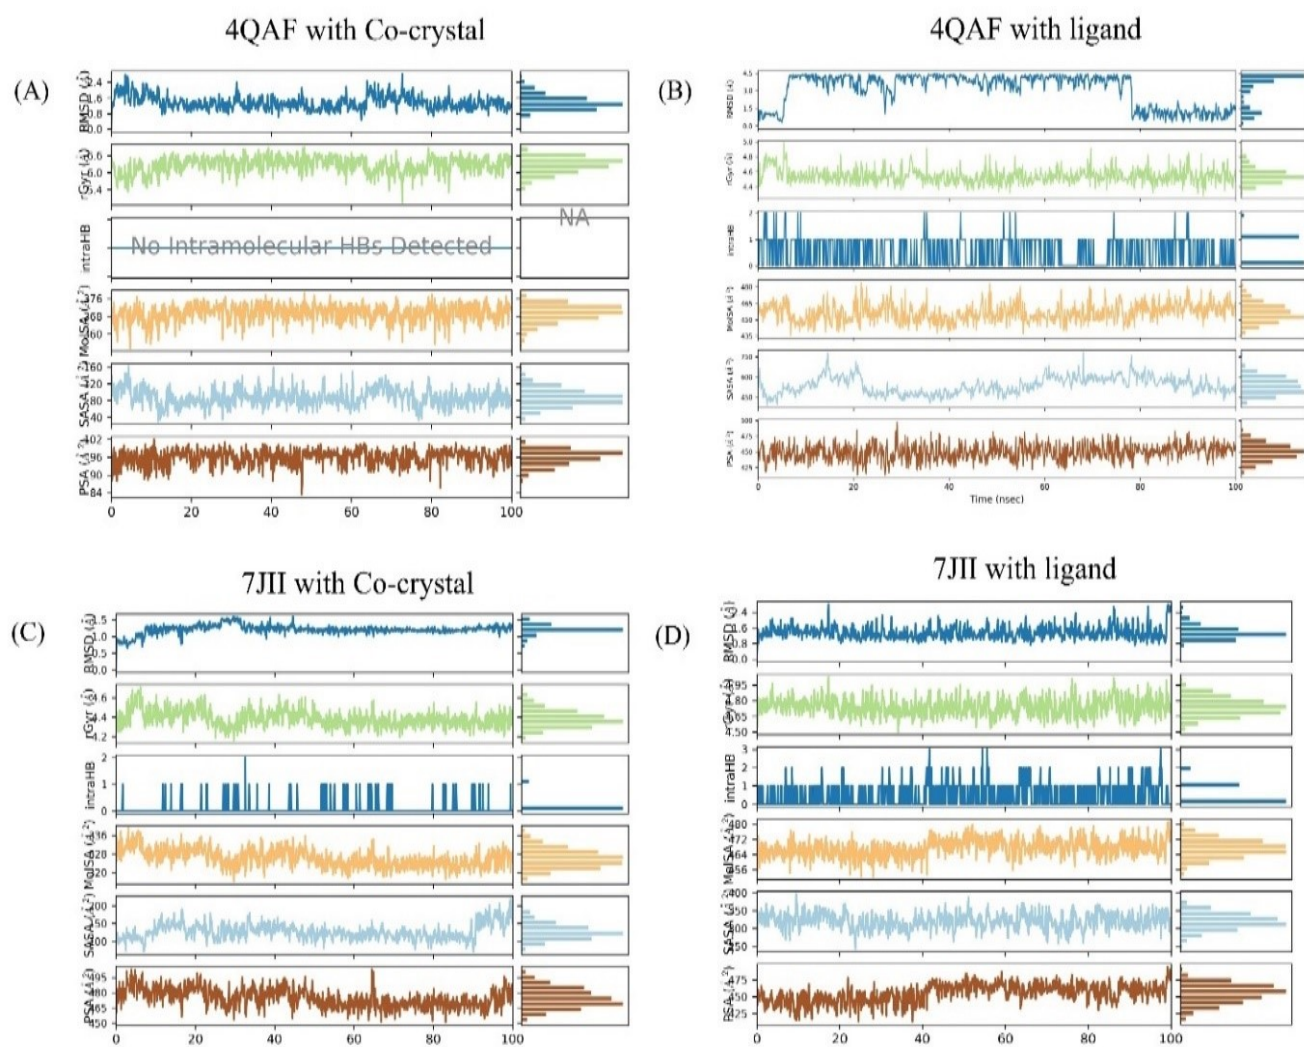

**Figure S9.** Ligand property analysis of VEGF with (A) co-crystallized ligand and (B) quercetin 3-O- $\beta$ -D-glucopyranosyl-(1->2)-rhamnopyranoside, HRAS with (C) co-crystallized ligand and (D) quercetin 3-O- $\beta$ -D-glucopyranosyl-(1->2)-rhamnopyranoside for 100 ns of molecular dynamics simulation time. RMSD: Root mean square deviation of a ligand concerning the reference conformation (typically the first frame is used as the reference and is regarded as time  $t = 0$ ). rGyr: Measures the 'extendedness' of a ligand and is



equivalent to its principal moment of inertia. intraHB: Number of internal hydrogen bonds within a ligand molecule. MolSA: Molecular surface calculation with a 1.4 Å probe radius. This value is equivalent to a van der Waals surface area. SASA: Surface area of a molecule accessible by a water molecule. PSA: Solvent-accessible surface area in a molecule contributed only by oxygen and nitrogen atoms.

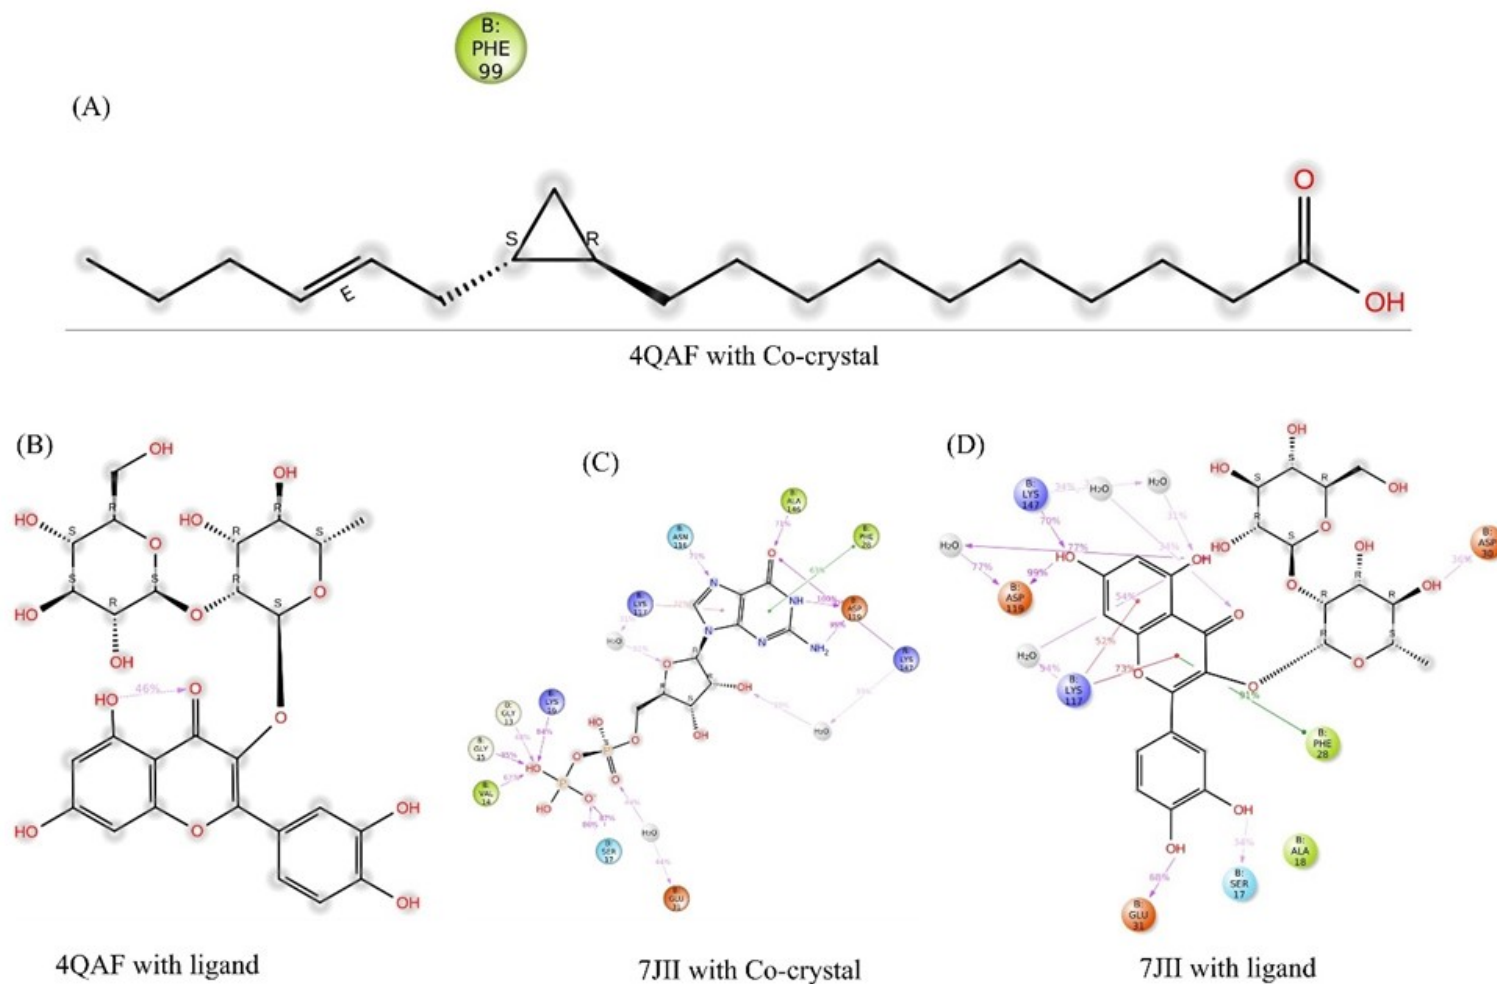

**Figure S10.** 2D interaction plot from post dynamics trajectories of (A) VEGF+Co-crystallized ligand (B) VEGF+quercetin 3-O- $\beta$ -D-glucopyranosyl-(1- $\rightarrow$ 2)-rhamnopyranoside and (C) HRAS+Co-crystallized ligand (D) HRAS+quercetin 3-O- $\beta$ -D-glucopyranosyl-(1- $\rightarrow$ 2)-rhamnopyranoside. The diagrams illustrate the intricate interactions between ligand atoms and protein residues. Only interactions occurring for over 30.0% of the simulation duration within the chosen trajectory (0–100 ns) are depicted.

**a**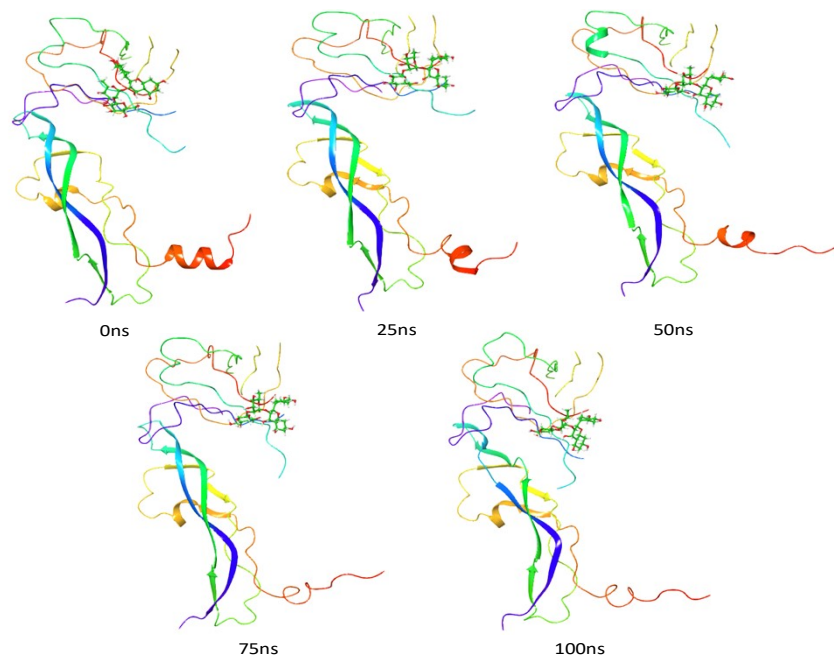**b**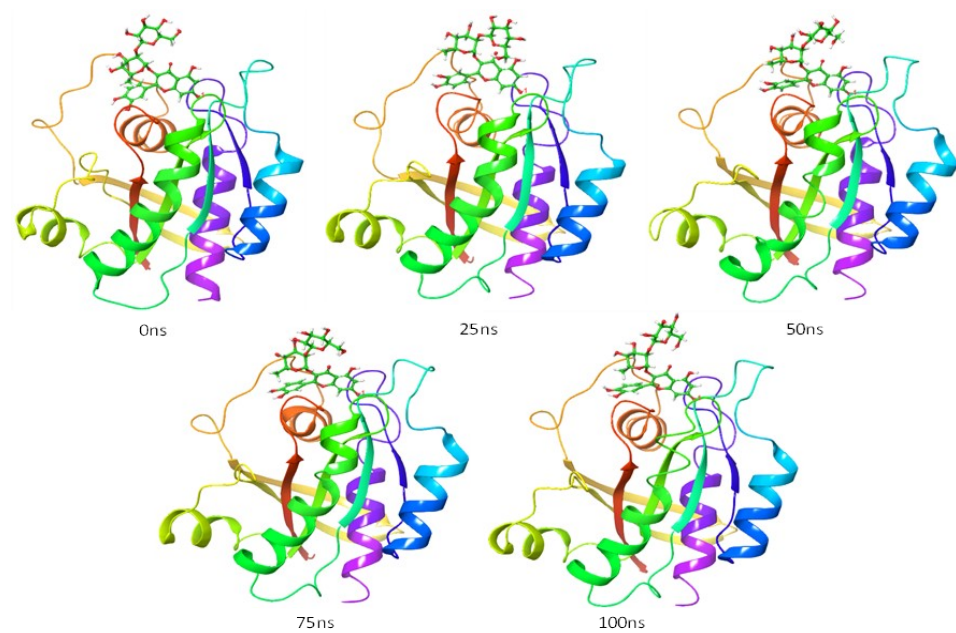

**Figure S11.** Time series snapshots of MD trajectories to analyze the pose of (C) 4QAF+quercetin 3-O- $\beta$ -D-glucopyranosyl-(1- $\rightarrow$ 2)-rhamnopyranoside and (D) 7JII+quercetin 3-O- $\beta$ -D-glucopyranosyl-(1- $\rightarrow$ 2)-rhamnopyranoside conformational deviation throughout 100 ns time.
